# Supplementary material for: Xenia and Deficit Nitrogen Influence the Iron and Zinc Concentration in the Grains of Hybrid Maize
Source: MDPI journal article supplement (doi:10.3390/agronomy11071388), 2021-07-09
Supplement: s1 [file s1]

## Supplementary Tables

**Table S1.** Mean performance for Fe, Zn, Pa and molar ratios of Fe and Zn with Pa in self- and open pollinated maize seeds under optimal conditions during season 1

| Hybrids             | Pollination | Fe (mg kg <sup>-1</sup> ) | Zn (mg kg <sup>-1</sup> ) | Pa (mg g <sup>-1</sup> ) | Fe:Pa | Zn:Pa |
|---------------------|-------------|---------------------------|---------------------------|--------------------------|-------|-------|
| SMH1                | Self        | 21.49                     | 22.98                     | 4.99                     | 20.21 | 21.39 |
|                     | Open        | 13.73                     | 19.30                     | 5.48                     | 24.05 | 26.12 |
| SMH2                | Self        | 17.61                     | 22.21                     | 4.74                     | 23.54 | 21.04 |
|                     | Open        | 15.13                     | 20.95                     | 4.91                     | 20.12 | 21.50 |
| SMH3                | Self        | 19.21                     | 24.01                     | 4.34                     | 19.64 | 17.82 |
|                     | Open        | 18.19                     | 19.93                     | 5.14                     | 22.26 | 24.29 |
| SMH4                | Self        | 20.06                     | 25.38                     | 5.20                     | 22.23 | 20.15 |
|                     | Open        | 13.68                     | 21.73                     | 5.16                     | 20.49 | 22.39 |
| SMH5                | Self        | 19.74                     | 20.46                     | 5.29                     | 22.75 | 25.32 |
|                     | Open        | 15.07                     | 19.88                     | 4.58                     | 19.99 | 21.41 |
| SMH6                | Self        | 18.42                     | 20.15                     | 4.50                     | 21.95 | 22.15 |
|                     | Open        | 15.24                     | 19.78                     | 4.88                     | 20.88 | 22.48 |
| SMH7                | Self        | 17.19                     | 19.55                     | 5.16                     | 27.05 | 25.99 |
|                     | Open        | 13.73                     | 17.03                     | 4.97                     | 24.43 | 26.24 |
| SMH8                | Self        | 19.81                     | 20.68                     | 5.40                     | 23.31 | 25.64 |
|                     | Open        | 14.58                     | 16.22                     | 4.68                     | 24.72 | 26.72 |
| SMH9                | Self        | 17.33                     | 18.53                     | 4.62                     | 22.26 | 24.64 |
|                     | Open        | 13.43                     | 19.49                     | 5.42                     | 23.45 | 25.38 |
| SMH10               | Self        | 17.06                     | 20.30                     | 4.86                     | 24.27 | 25.54 |
|                     | Open        | 14.76                     | 18.52                     | 5.02                     | 23.38 | 24.89 |
| SMH11               | Self        | 17.80                     | 18.20                     | 4.49                     | 21.44 | 24.40 |
|                     | Open        | 14.30                     | 18.34                     | 5.11                     | 24.08 | 25.96 |
| SMH12               | Self        | 17.45                     | 21.93                     | 4.18                     | 20.52 | 18.94 |
|                     | Open        | 16.63                     | 19.11                     | 5.15                     | 22.99 | 24.91 |
| SMH13               | Self        | 19.43                     | 20.73                     | 5.83                     | 25.97 | 27.64 |
|                     | Open        | 12.84                     | 18.73                     | 5.68                     | 25.79 | 28.14 |
| SMH14               | Self        | 15.28                     | 19.23                     | 4.36                     | 26.08 | 22.41 |
|                     | Open        | 12.28                     | 17.39                     | 4.35                     | 21.17 | 22.43 |
| SMH15               | Self        | 18.74                     | 19.46                     | 5.21                     | 23.55 | 26.56 |
|                     | Open        | 15.39                     | 16.41                     | 5.11                     | 26.72 | 28.95 |
| SMH16               | Self        | 15.11                     | 19.23                     | 5.05                     | 28.73 | 25.97 |
|                     | Open        | 13.32                     | 20.68                     | 5.37                     | 22.25 | 24.21 |
| SMH17               | Self        | 18.95                     | 19.83                     | 4.64                     | 21.10 | 23.06 |
|                     | Open        | 12.56                     | 17.03                     | 4.94                     | 24.91 | 26.83 |
| SMH18               | Self        | 19.36                     | 19.99                     | 5.47                     | 24.00 | 27.40 |
|                     | Open        | 16.23                     | 19.86                     | 4.67                     | 20.04 | 21.73 |
| LSD <sub>0.05</sub> | Self        | 0.74                      | 0.69                      | 0.54                     | 3.17  | 3.02  |
|                     | Open        | 0.83                      | 1.53                      | 0.22                     | 1.77  | 2.04  |

SMH=Sajjad maize hybrid, Fe=iron, Zn=zinc, Pa=phytic acid, Fe:Pa=molar ratio of Fe with Pa, Zn:Pa=molar ratio of Zn with Pa, LSD=least significant difference.

**Table S2.** Analysis of variance showing mean squares for Fe, Zn, Pa and molar ratios of Fe and Zn with Pa in self and open pollinated maize seeds under optimal conditions during season 1

| Source               | df | Pollination | Fe (mg kg <sup>-1</sup> ) | Zn (mg kg <sup>-1</sup> ) | Pa (mg g <sup>-1</sup> ) | Fe:Pa     | Zn:Pa      |
|----------------------|----|-------------|---------------------------|---------------------------|--------------------------|-----------|------------|
| Block                | 2  | Self        | 0.74                      | 0.31                      | 0.09                     | 4.37      | 2.50       |
|                      |    | Open        | 1.62                      | 2.04                      | 0.03                     | 3.70      | 4.77       |
| Location (L)         | 1  | Self        | 225.07***                 | 6.21***                   | 1.21**                   | 231.45*** | 7.52       |
|                      |    | Open        | 73.91***                  | 21.33***                  | 14.85***                 | 171.42*** | 1138.39*** |
| Entry (E)            | 17 | Self        | 10.81***                  | 14.54***                  | 0.82***                  | 24.15***  | 234.29***  |
|                      |    | Open        | 13.81***                  | 15.10***                  | 0.68***                  | 26.10***  | 32.02***   |
| E × L                | 17 | Self        | 14.40***                  | 10.43***                  | 0.48**                   | 39.41***  | 28.56***   |
|                      |    | Open        | 12.32***                  | 11.12***                  | 0.62***                  | 20.31***  | 26.94***   |
| Residual             | 34 | Self        | 0.38                      | 0.33                      | 0.20                     | 7.04      | 6.37       |
|                      |    | Open        | 0.74                      | 2.49                      | 0.05                     | 3.36      | 4.44       |
| R <sup>2</sup> value |    | Self        | 0.98                      | 0.97                      | 0.77                     | 0.85      | 0.83       |
|                      |    | Open        | 0.96                      | 0.84                      | 0.96                     | 0.90      | 0.94       |

\*\* P ≤ 0.01, \*\*\* P ≤ 0.001, df=degrees of freedom, Fe=iron, Zn=zinc, Pa=phytic acid, Fe:Pa=molar ratio of Fe with Pa, Zn:Pa=molar ratio of Zn with Pa.

**Table S3.** Mean performance for Fe, Zn, Pa and molar ratios of Fe and Zn with Pa in self and open pollinated maize seeds under low N conditions during season 1

| Hybrids             | Pollination | Fe (mg kg <sup>-1</sup> ) | Zn (mg kg <sup>-1</sup> ) | Pa (mg g <sup>-1</sup> ) | Fe:Pa | Zn:Pa |
|---------------------|-------------|---------------------------|---------------------------|--------------------------|-------|-------|
| SMH1                | Self        | 20.98                     | 17.43                     | 6.03                     | 25.66 | 37.38 |
|                     | Open        | 18.37                     | 15.22                     | 4.79                     | 29.36 | 34.08 |
| SMH2                | Self        | 22.11                     | 18.97                     | 6.27                     | 24.15 | 34.85 |
|                     | Open        | 17.15                     | 18.86                     | 5.58                     | 27.56 | 31.99 |
| SMH3                | Self        | 19.80                     | 20.09                     | 5.95                     | 27.85 | 32.32 |
|                     | Open        | 12.90                     | 15.89                     | 5.08                     | 28.47 | 33.05 |
| SMH4                | Self        | 17.98                     | 21.34                     | 6.52                     | 33.20 | 31.54 |
|                     | Open        | 17.64                     | 15.99                     | 5.50                     | 31.01 | 35.99 |
| SMH5                | Self        | 14.10                     | 16.53                     | 6.08                     | 36.67 | 37.57 |
|                     | Open        | 17.02                     | 14.62                     | 6.01                     | 38.89 | 45.14 |
| SMH6                | Self        | 16.69                     | 16.36                     | 5.37                     | 27.39 | 30.58 |
|                     | Open        | 19.21                     | 14.79                     | 4.47                     | 29.19 | 33.88 |
| SMH7                | Self        | 21.85                     | 15.79                     | 6.63                     | 26.15 | 36.23 |
|                     | Open        | 15.10                     | 17.22                     | 5.19                     | 26.69 | 30.98 |
| SMH8                | Self        | 14.64                     | 18.47                     | 5.51                     | 32.05 | 31.69 |
|                     | Open        | 12.34                     | 13.75                     | 5.55                     | 37.09 | 43.05 |
| SMH9                | Self        | 14.24                     | 14.98                     | 5.73                     | 34.61 | 40.35 |
|                     | Open        | 16.20                     | 15.77                     | 4.85                     | 26.36 | 30.60 |
| SMH10               | Self        | 18.75                     | 19.21                     | 6.10                     | 27.67 | 31.34 |
|                     | Open        | 18.18                     | 16.43                     | 5.32                     | 28.54 | 33.13 |
| SMH11               | Self        | 17.89                     | 21.31                     | 4.94                     | 23.46 | 29.49 |
|                     | Open        | 20.77                     | 17.30                     | 5.00                     | 24.67 | 28.63 |
| SMH12               | Self        | 19.70                     | 15.61                     | 5.51                     | 25.13 | 35.85 |
|                     | Open        | 12.38                     | 16.55                     | 4.87                     | 25.67 | 29.80 |
| SMH13               | Self        | 19.11                     | 17.49                     | 5.99                     | 26.64 | 31.65 |
|                     | Open        | 17.08                     | 15.38                     | 5.49                     | 30.94 | 35.91 |
| SMH14               | Self        | 12.88                     | 15.74                     | 5.84                     | 38.62 | 29.41 |
|                     | Open        | 11.58                     | 15.32                     | 5.20                     | 28.69 | 33.30 |
| SMH15               | Self        | 17.11                     | 15.66                     | 5.52                     | 28.07 | 39.17 |
|                     | Open        | 14.68                     | 16.51                     | 5.46                     | 29.92 | 34.73 |
| SMH16               | Self        | 20.83                     | 18.41                     | 5.92                     | 24.08 | 29.35 |
|                     | Open        | 14.26                     | 12.51                     | 5.69                     | 39.23 | 45.54 |
| SMH17               | Self        | 17.50                     | 15.68                     | 4.86                     | 24.12 | 27.99 |
|                     | Open        | 18.73                     | 15.56                     | 5.09                     | 27.92 | 32.41 |
| SMH18               | Self        | 14.34                     | 16.71                     | 5.47                     | 32.48 | 31.37 |
|                     | Open        | 12.57                     | 18.57                     | 4.47                     | 25.57 | 29.67 |
| LSD <sub>0.05</sub> | Self        | 0.81                      | 1.66                      | 0.66                     | 3.98  | 5.12  |
|                     | Open        | 0.70                      | 1.67                      | 0.61                     | 4.97  | 5.76  |

SMH=Sajjad maize hybrid, Fe=iron, Zn=zinc, Pa=phytic acid, Fe:Pa=molar ratio of Fe with Pa, Zn:Pa=molar ratio of Zn with Pa, LSD=least significant difference.

**Table S4.** Analysis of variance showing mean squares for Fe, Zn, Pa and molar ratios of Fe and Zn with Pa in self and open pollinated maize seeds under low N conditions during season 1

| Source               | df | Pollination | Fe (mg kg <sup>-1</sup> ) | Zn (mg kg <sup>-1</sup> ) | Pa (mg g <sup>-1</sup> ) | Fe:Pa     | Zn:Pa     |
|----------------------|----|-------------|---------------------------|---------------------------|--------------------------|-----------|-----------|
| Block                | 2  | Self        | 0.11                      | 6.39                      | 0.67                     | 18.23     | 16.95     |
|                      |    | Open        | 0.65                      | 1.99                      | 0.18                     | 35.52     | 47.80     |
| Location (L)         | 1  | Self        | 136.73***                 | 3.66                      | 1.56*                    | 78.06**   | 141.15**  |
|                      |    | Open        | 104.56***                 | 301.76***                 | 21.02***                 | 593.76*** | 799.99*** |
| Entry (E)            | 17 | Self        | 32.67***                  | 16.06***                  | 0.91**                   | 86.99***  | 55.08**   |
|                      |    | Open        | 45.91***                  | 11.78***                  | 1.04**                   | 114.36*** | 154.04*** |
| E × L                | 17 | Self        | 20.52***                  | 10.11***                  | 1.14***                  | 90.05***  | 90.63***  |
|                      |    | Open        | 26.16***                  | 24.54***                  | 0.71*                    | 121.37*** | 163.49*** |
| Residual             | 34 | Self        | 0.46                      | 1.93                      | 0.31                     | 11.08     | 18.31     |
|                      |    | Open        | 0.52                      | 2.98                      | 0.40                     | 26.36     | 35.52     |
| R <sup>2</sup> value |    | Self        | 0.99                      | 0.88                      | 0.78                     | 0.90      | 0.81      |
|                      |    | Open        | 0.99                      | 0.92                      | 0.80                     | 0.85      | 0.84      |

\*  $P \leq 0.05$ , \*\*  $P \leq 0.01$ , \*\*\*  $P \leq 0.001$ , df=degrees of freedom, Fe=iron, Zn=zinc, Pa=phytic acid, Fe:Pa=molar ratio of Fe with Pa, Zn:Pa=molar ratio of Zn with Pa.

**Table S5.** Mean performance for Fe, Zn, Pa and molar ratios of Fe and Zn with Pa in self and open pollinated maize seeds under optimal conditions during season 2

| Hybrids             | Pollination | Fe (mg kg <sup>-1</sup> ) | Zn (mg kg <sup>-1</sup> ) | Pa (mg g <sup>-1</sup> ) | Fe:Pa | Zn:Pa |
|---------------------|-------------|---------------------------|---------------------------|--------------------------|-------|-------|
| SMH1                | Self        | 21.24                     | 22.08                     | 6.11                     | 24.37 | 27.33 |
|                     | Open        | 19.95                     | 23.14                     | 6.29                     | 27.08 | 27.37 |
| SMH2                | Self        | 16.21                     | 21.64                     | 5.47                     | 29.28 | 26.33 |
|                     | Open        | 19.46                     | 20.74                     | 5.31                     | 23.30 | 25.64 |
| SMH3                | Self        | 12.64                     | 21.98                     | 5.85                     | 41.40 | 28.03 |
|                     | Open        | 20.05                     | 22.44                     | 5.92                     | 25.44 | 25.93 |
| SMH4                | Self        | 20.23                     | 23.30                     | 5.93                     | 26.45 | 27.29 |
|                     | Open        | 21.65                     | 24.80                     | 5.90                     | 23.39 | 23.45 |
| SMH5                | Self        | 19.86                     | 18.86                     | 5.44                     | 23.49 | 29.54 |
|                     | Open        | 20.16                     | 22.23                     | 5.71                     | 24.15 | 25.27 |
| SMH6                | Self        | 18.79                     | 19.11                     | 5.71                     | 27.60 | 32.07 |
|                     | Open        | 15.77                     | 20.22                     | 5.82                     | 31.74 | 28.52 |
| SMH7                | Self        | 17.01                     | 18.90                     | 6.28                     | 31.34 | 32.77 |
|                     | Open        | 17.56                     | 18.81                     | 5.88                     | 29.66 | 30.84 |
| SMH8                | Self        | 18.40                     | 17.95                     | 5.38                     | 24.85 | 32.12 |
|                     | Open        | 17.20                     | 18.33                     | 5.31                     | 26.32 | 28.66 |
| SMH9                | Self        | 19.99                     | 19.58                     | 6.22                     | 26.45 | 31.37 |
|                     | Open        | 19.06                     | 19.51                     | 5.62                     | 25.11 | 28.30 |
| SMH10               | Self        | 18.15                     | 19.75                     | 5.80                     | 28.50 | 30.56 |
|                     | Open        | 19.76                     | 19.87                     | 5.61                     | 24.91 | 28.19 |
| SMH11               | Self        | 20.70                     | 18.80                     | 6.27                     | 28.51 | 34.71 |
|                     | Open        | 21.94                     | 18.38                     | 5.18                     | 20.33 | 27.87 |
| SMH12               | Self        | 18.79                     | 18.74                     | 5.08                     | 23.46 | 28.59 |
|                     | Open        | 19.82                     | 18.64                     | 5.47                     | 23.47 | 29.06 |
| SMH13               | Self        | 15.71                     | 19.43                     | 6.30                     | 34.07 | 33.27 |
|                     | Open        | 17.67                     | 21.29                     | 6.06                     | 30.65 | 28.21 |
| SMH14               | Self        | 17.79                     | 20.80                     | 5.55                     | 26.59 | 26.21 |
|                     | Open        | 16.41                     | 18.59                     | 5.58                     | 29.29 | 30.10 |
| SMH15               | Self        | 15.19                     | 18.78                     | 6.04                     | 33.80 | 32.37 |
|                     | Open        | 18.01                     | 19.57                     | 5.88                     | 28.44 | 29.79 |
| SMH16               | Self        | 17.55                     | 19.88                     | 6.02                     | 29.17 | 31.06 |
|                     | Open        | 17.99                     | 19.16                     | 6.02                     | 29.65 | 31.36 |
| SMH17               | Self        | 21.93                     | 19.81                     | 5.85                     | 26.29 | 31.94 |
|                     | Open        | 20.09                     | 19.82                     | 5.57                     | 23.87 | 28.32 |
| SMH18               | Self        | 20.08                     | 19.26                     | 4.98                     | 21.07 | 25.62 |
|                     | Open        | 21.94                     | 20.30                     | 5.63                     | 21.77 | 27.70 |
| LSD <sub>0.05</sub> | Self        | 0.96                      | 1.31                      | 0.41                     | 3.34  | 3.07  |
|                     | Open        | 1.00                      | 0.92                      | 0.26                     | 2.37  | 1.91  |

SMH=Sajjad maize hybrid, Fe=iron, Zn=zinc, Pa=phytic acid, Fe:Pa=molar ratio of Fe with Pa, Zn:Pa=molar ratio of Zn with Pa, LSD=least significant difference.

**Table S6.** Analysis of variance showing mean squares for Fe, Zn, Pa and molar ratios of Fe and Zn with Pa in self and open pollinated maize seeds under optimal conditions during season 2

| Source               | df | Pollination | Fe (mg kg <sup>-1</sup> ) | Zn (mg kg <sup>-1</sup> ) | Pa (mg g <sup>-1</sup> ) | Fe:Pa     | Zn:Pa      |
|----------------------|----|-------------|---------------------------|---------------------------|--------------------------|-----------|------------|
| Block                | 2  | Self        | 1.26                      | 0.87                      | 0.16                     | 22.82     | 6.47       |
|                      |    | Open        | 0.31                      | 0.28                      | 0.20                     | 3.04      | 6.14       |
| Location (L)         | 1  | Self        | 131.38***                 | 637.90***                 | 15.77***                 | 977.85*** | 3325.75*** |
|                      |    | Open        | 4.65**                    | 157.57***                 | 3.29***                  | 122.67*** | 101.57***  |
| Entry (E)            | 17 | Self        | 22.45***                  | 8.36***                   | 0.67***                  | 90.96***  | 30.44***   |
|                      |    | Open        | 19.85***                  | 19.83***                  | 0.50***                  | 63.60***  | 23.84***   |
| E × L                | 17 | Self        | 26.84***                  | 13.55***                  | 0.62***                  | 88.15***  | 54.01***   |
|                      |    | Open        | 21.17***                  | 6.98***                   | 0.46***                  | 38.47***  | 16.07***   |
| Residual             | 34 | Self        | 0.64                      | 1.20                      | 0.12                     | 7.81      | 6.60       |
|                      |    | Open        | 1.07                      | 0.90                      | 0.07                     | 6.01      | 3.90       |
| R <sup>2</sup> value |    | Self        | 0.98                      | 0.96                      | 0.90                     | 0.94      | 0.96       |
|                      |    | Open        | 0.95                      | 0.95                      | 0.90                     | 0.90      | 0.85       |

\*\* P ≤ 0.01, \*\*\* P ≤ 0.001, df=degrees of freedom, Fe=iron, Zn=zinc, Pa=phytic acid, Fe:Pa=molar ratio of Fe with Pa, Zn:Pa=molar ratio of Zn with Pa.

**Table S7.** Mean performance for Fe, Zn, Pa and molar ratios of Fe and Zn with Pa in self and open pollinated maize seeds under low N conditions during season 2

| Hybrids             | Pollination | Fe (mg kg <sup>-1</sup> ) | Zn (mg kg <sup>-1</sup> ) | Pa (mg g <sup>-1</sup> ) | Fe:Pa | Zn:Pa |
|---------------------|-------------|---------------------------|---------------------------|--------------------------|-------|-------|
| SMH1                | Self        | 10.87                     | 22.72                     | 6.89                     | 55.64 | 30.09 |
|                     | Open        | 18.64                     | 23.00                     | 6.66                     | 32.59 | 29.19 |
| SMH2                | Self        | 16.27                     | 27.58                     | 6.20                     | 33.39 | 22.49 |
|                     | Open        | 15.04                     | 23.00                     | 6.52                     | 38.00 | 28.31 |
| SMH3                | Self        | 16.41                     | 20.63                     | 6.03                     | 33.45 | 29.00 |
|                     | Open        | 14.58                     | 23.56                     | 6.92                     | 43.44 | 29.31 |
| SMH4                | Self        | 14.09                     | 22.17                     | 6.32                     | 41.01 | 28.45 |
|                     | Open        | 18.25                     | 23.23                     | 6.32                     | 30.21 | 26.98 |
| SMH5                | Self        | 17.04                     | 24.41                     | 6.80                     | 34.17 | 27.44 |
|                     | Open        | 16.18                     | 22.35                     | 6.42                     | 34.99 | 28.43 |
| SMH6                | Self        | 15.48                     | 20.46                     | 6.13                     | 33.75 | 29.62 |
|                     | Open        | 14.38                     | 19.65                     | 5.96                     | 35.32 | 30.43 |
| SMH7                | Self        | 16.42                     | 19.13                     | 6.39                     | 33.73 | 32.92 |
|                     | Open        | 12.56                     | 19.95                     | 6.99                     | 48.82 | 34.57 |
| SMH8                | Self        | 12.44                     | 18.87                     | 6.43                     | 47.20 | 33.89 |
|                     | Open        | 13.54                     | 19.00                     | 6.73                     | 42.71 | 35.39 |
| SMH9                | Self        | 13.99                     | 18.19                     | 6.19                     | 37.49 | 34.72 |
|                     | Open        | 16.29                     | 17.90                     | 6.36                     | 37.34 | 35.02 |
| SMH10               | Self        | 16.75                     | 22.63                     | 6.43                     | 34.07 | 28.44 |
|                     | Open        | 12.46                     | 20.33                     | 6.56                     | 45.02 | 31.81 |
| SMH11               | Self        | 13.98                     | 20.32                     | 5.55                     | 33.90 | 27.32 |
|                     | Open        | 13.83                     | 18.83                     | 6.38                     | 40.30 | 33.83 |
| SMH12               | Self        | 11.83                     | 17.87                     | 6.38                     | 47.34 | 35.79 |
|                     | Open        | 14.75                     | 18.63                     | 5.90                     | 34.99 | 31.65 |
| SMH13               | Self        | 11.50                     | 16.83                     | 6.07                     | 45.25 | 36.85 |
|                     | Open        | 14.89                     | 21.40                     | 6.76                     | 38.73 | 31.42 |
| SMH14               | Self        | 12.87                     | 18.58                     | 5.90                     | 42.96 | 31.58 |
|                     | Open        | 13.38                     | 18.77                     | 5.74                     | 36.41 | 30.53 |
| SMH15               | Self        | 16.46                     | 18.80                     | 6.11                     | 31.53 | 32.09 |
|                     | Open        | 14.08                     | 19.74                     | 6.68                     | 41.06 | 33.45 |
| SMH16               | Self        | 16.48                     | 21.98                     | 6.19                     | 32.29 | 28.57 |
|                     | Open        | 17.15                     | 22.46                     | 6.63                     | 33.89 | 29.60 |
| SMH17               | Self        | 17.76                     | 21.91                     | 5.61                     | 26.83 | 25.40 |
|                     | Open        | 15.92                     | 21.05                     | 5.65                     | 30.56 | 26.56 |
| SMH18               | Self        | 15.19                     | 15.90                     | 5.19                     | 29.17 | 32.51 |
|                     | Open        | 17.05                     | 19.99                     | 5.99                     | 30.08 | 30.06 |
| LSD <sub>0.05</sub> | Self        | 1.10                      | 1.48                      | 0.33                     | 3.18  | 2.89  |
|                     | Open        | 0.92                      | 1.35                      | 0.31                     | 2.98  | 2.26  |

SMH=Sajjad maize hybrid, Fe=iron, Zn=zinc, Pa=phytic acid, Fe:Pa=molar ratio of Fe with Pa, Zn:Pa=molar ratio of Zn with Pa, LSD=least significant difference.

**Table S8.** Analysis of variance showing mean squares for Fe, Zn, Pa and molar ratios of Fe and Zn with Pa in self and open pollinated maize seeds under low N conditions during season 2

| Source               | df | Pollination | Fe (mg kg <sup>-1</sup> ) | Zn (mg kg <sup>-1</sup> ) | Pa (mg g <sup>-1</sup> ) | Fe:Pa     | Zn:Pa     |
|----------------------|----|-------------|---------------------------|---------------------------|--------------------------|-----------|-----------|
| Block                | 2  | Self        | 0.50                      | 1.63                      | 0.06                     | 11.59     | 1.94      |
|                      |    | Open        | 0.58                      | 1.21                      | 0.13                     | 13.17     | 5.80      |
| Location (L)         | 1  | Self        | 137.75***                 | 68.33***                  | 9.89***                  | 304.64*** | 285.26*** |
|                      |    | Open        | 163.05***                 | 139.95***                 | 5.75***                  | 533.26*** | 608.95*** |
| Entry (E)            | 17 | Self        | 27.34***                  | 49.35***                  | 1.04***                  | 340.66*** | 83.29***  |
|                      |    | Open        | 19.81***                  | 20.13***                  | 0.96***                  | 171.12*** | 43.23***  |
| E × L                | 17 | Self        | 15.05***                  | 11.94***                  | 0.37***                  | 124.80*** | 41.98***  |
|                      |    | Open        | 14.16***                  | 3.87**                    | 0.37***                  | 119.08*** | 11.04**   |
| Residual             | 34 | Self        | 1.30                      | 2.33                      | 0.12                     | 10.84     | 8.94      |
|                      |    | Open        | 0.91                      | 1.96                      | 0.10                     | 9.47      | 5.44      |
| R <sup>2</sup> value |    | Self        | 0.95                      | 0.92                      | 0.90                     | 0.95      | 0.88      |
|                      |    | Open        | 0.96                      | 0.88                      | 0.89                     | 0.94      | 0.89      |

\*\* P ≤ 0.01, \*\*\* P ≤ 0.001, df=degrees of freedom, Fe=iron, Zn=zinc, Pa=phytic acid, Fe:Pa=molar ratio of Fe with Pa, Zn:Pa=molar ratio of Zn with Pa.
